# Supplementary material for: Achieving high electrical conductivity, energy storage capacity and cycling stability in ammoniated Mo2TiC2Tx MXenes as an anode for lithium-ion batteries
Source: Royal Society of Chemistry journal article supplement (doi:10.1039/d4ta03870c), 2024-01-01
Supplement: d4ta03870c1.pdf [file d4ta03870c1.pdf]

## Supporting Information

### **Achieving High Electrical Conductivity, Energy Storage Capacity and Cycling Stability in Ammoniated $\text{Mo}_2\text{TiC}_2\text{T}_x$ MXenes as Anode for Lithium-ion Battery**

Jingya Liu, Xin Xu, Kai Wu, Hongkang Wang, Pengfei Wang, Yonghong Cheng\*, Bing Xiao\*  
School of Electrical Engineering, Xi'an Jiaotong University, Xi'an Shaanxi, 710049, P.R. China  
Corresponding authors: [cyh@xjtu.edu.cn](mailto:cyh@xjtu.edu.cn); [bingxiao84@xjtu.edu.cn](mailto:bingxiao84@xjtu.edu.cn)

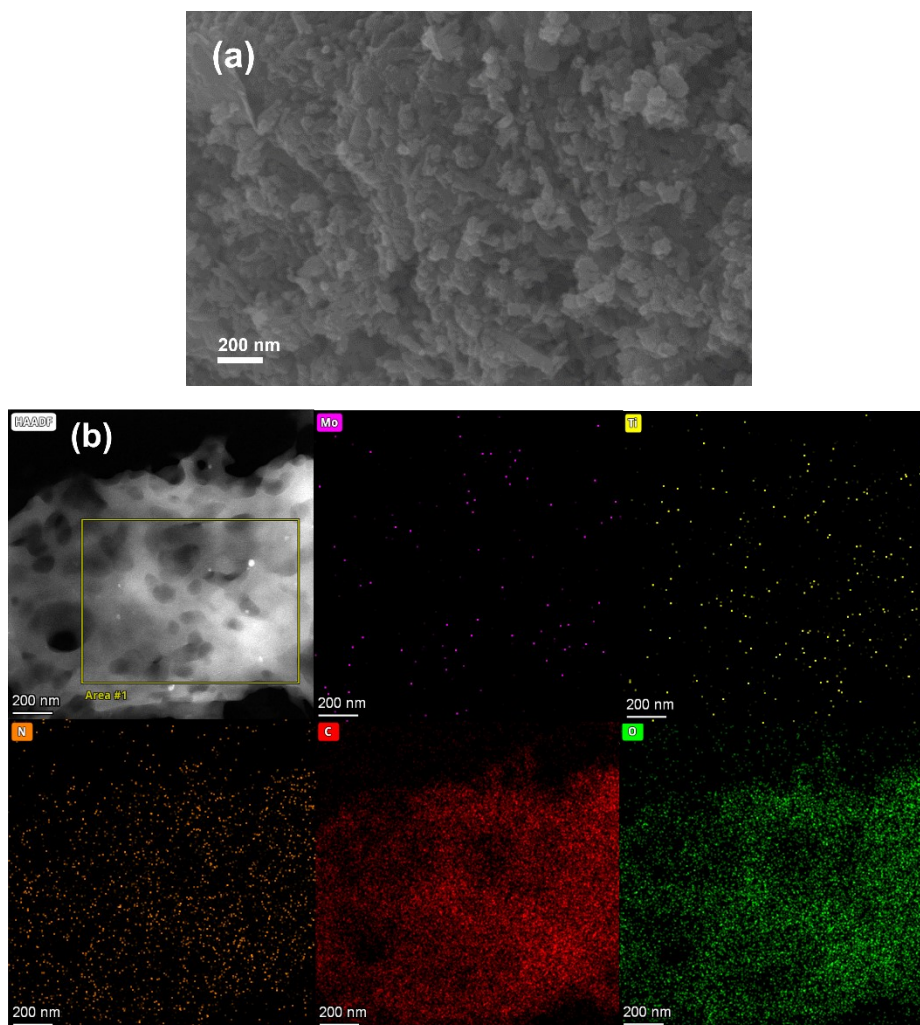

**Figure S1.** (a) The SEM image of  $\text{Mo}_2\text{TiC}_2\text{-N600-2h}$ ; (b) the HAADF image and the EDS mapping images of  $\text{Mo}_2\text{TiC}_2\text{T}_x\text{-N600-2h}$ .

**Table S1.** The element component fraction from EDS in Fig. S1(b)

| Element | Atomic Fraction (%) | Mass Fraction (%) |
|---------|---------------------|-------------------|
| C       | 86.74               | 82.87             |
| N       | 0.4                 | 0.44              |
| O       | 12.81               | 16.3              |
| Ti      | 0.02                | 0.06              |
| Mo      | 0.04                | 0.33              |

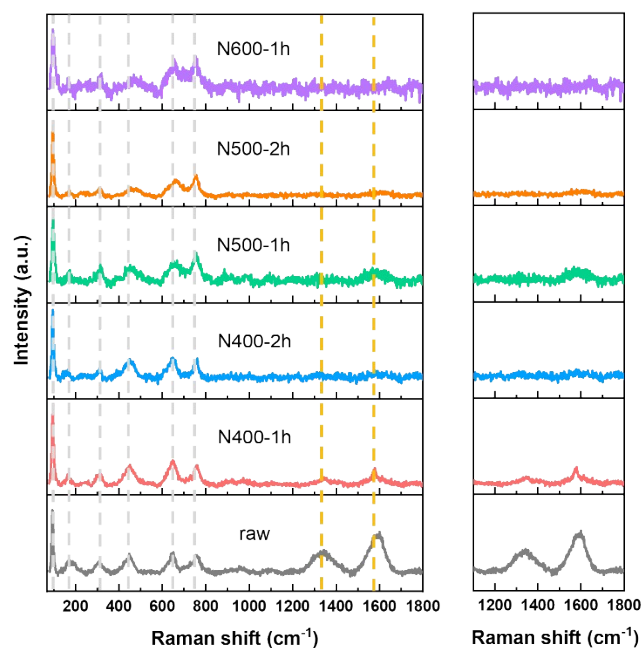

**Figure S2.** Raman spectra of  $\text{Mo}_2\text{TiC}_2$  before and after ammoniation at 400, 500 and 600 °C for 1h/2h and then 300 °C annealing in  $\text{N}_2$  for 1h. All spectra were collected with a 532 nm laser after 30s of exposure to 10% power.

The two peaks within the wavenumber range of 1300~1600  $\text{cm}^{-1}$  (1342.9 and 1598.7  $\text{cm}^{-1}$ ) are distinctive Raman features at around 1355 (D peak) and 1600  $\text{cm}^{-1}$  (G peak) of graphene, which means the  $\text{SP}^2$  hybridized peak commonly presented in transition metal carbides (TMDs)<sup>[1]</sup>. After ammonification at 400, 500 and 600°C, the peaks of carbon vibrations region nearly disappear, indicated that the hybrid structure of  $\text{SP}^2$  has undergone a change, with nitrogen elements added to the graphite structure, which disrupts its symmetry.

The layer size ( $L_c$ ) was estimated using the Scherrer equation (Eqs. 1)<sup>[2]</sup>:

$$L_c = A\lambda / (B \cos \theta) \quad (1)$$

where  $A$  is the shape factor ( $\sim 0.943$ );  $\lambda$  is the X-ray wavelength ( $\sim 1.54056 \text{ \AA}$ );  $\theta$  the Bragg angle;  $B$  is the full width at half maximum (FWHM) of the (002) peak in radians. The results are listed in main article [Table 1](#). The crystallite size decreased slightly on introduction of ammoniation at 400 °C from 1 h to 2 h. However, the decrease in  $L_c$  becomes more significant by increasing the temperature up to 500 °C.  $L_c$  is based on the (002) peak and reflects the Z dimension of the MXenes plates (thickness)<sup>[3][4]</sup>; the parameters are listed in main article [Table 1](#). When the ammoniation temperature exceeded 500 °C, the  $L_c$  was nearly reduced to half.

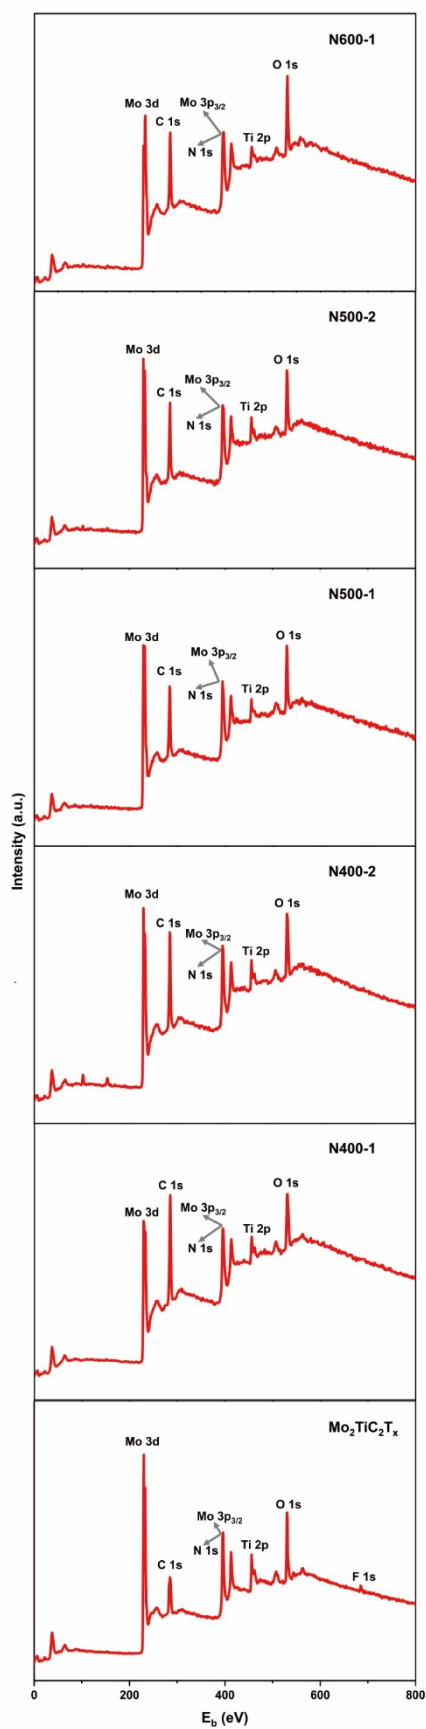

**Figure S3.** XPS spectra of N-600, 500, 400 and Mo<sub>2</sub>TiC<sub>2</sub>T<sub>x</sub> respectively.

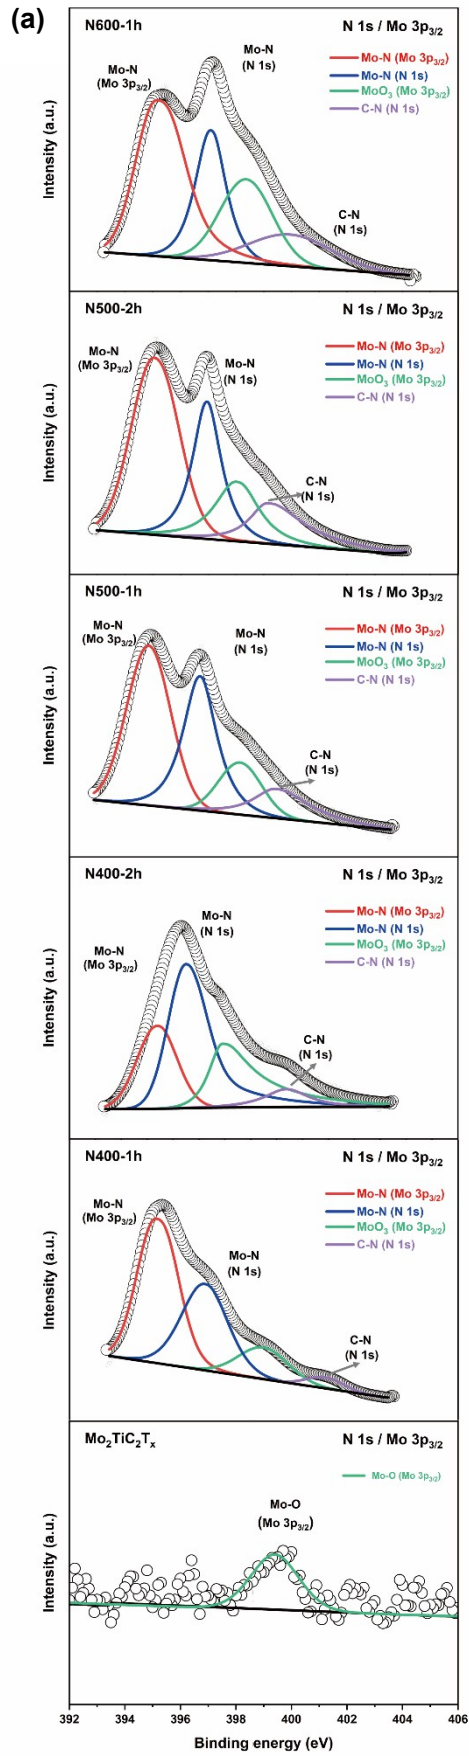

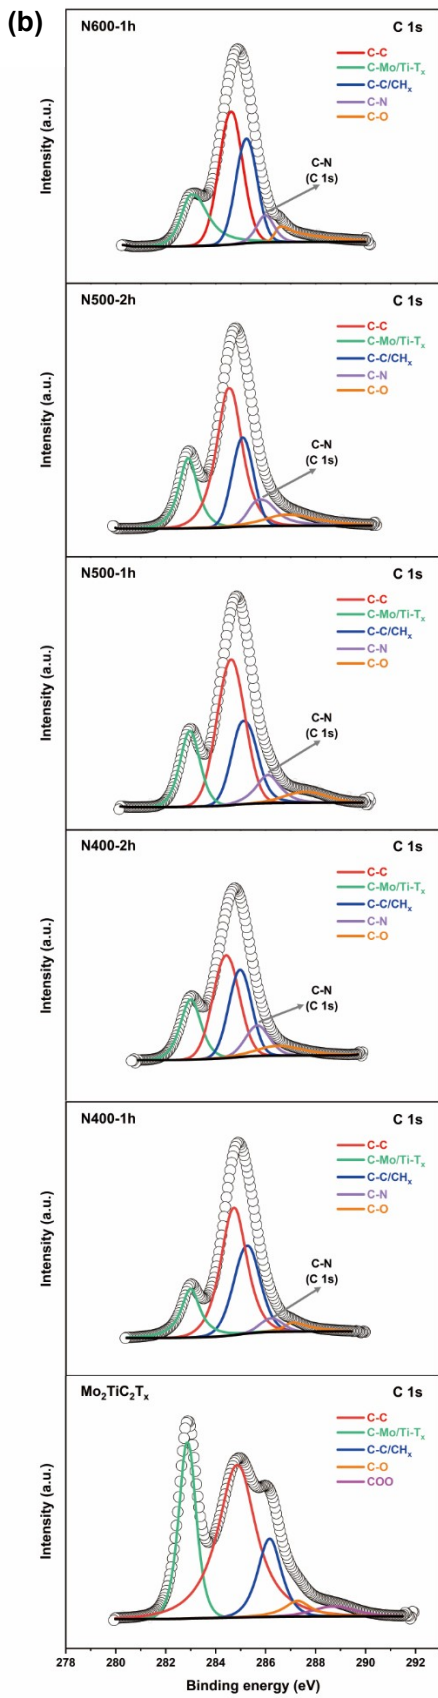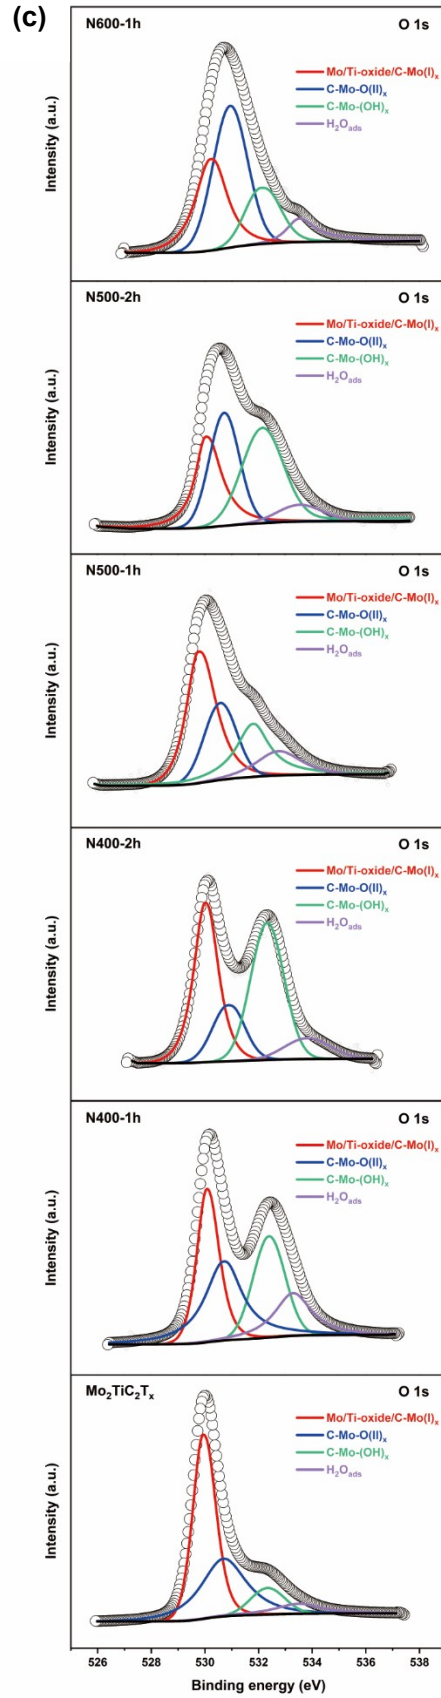



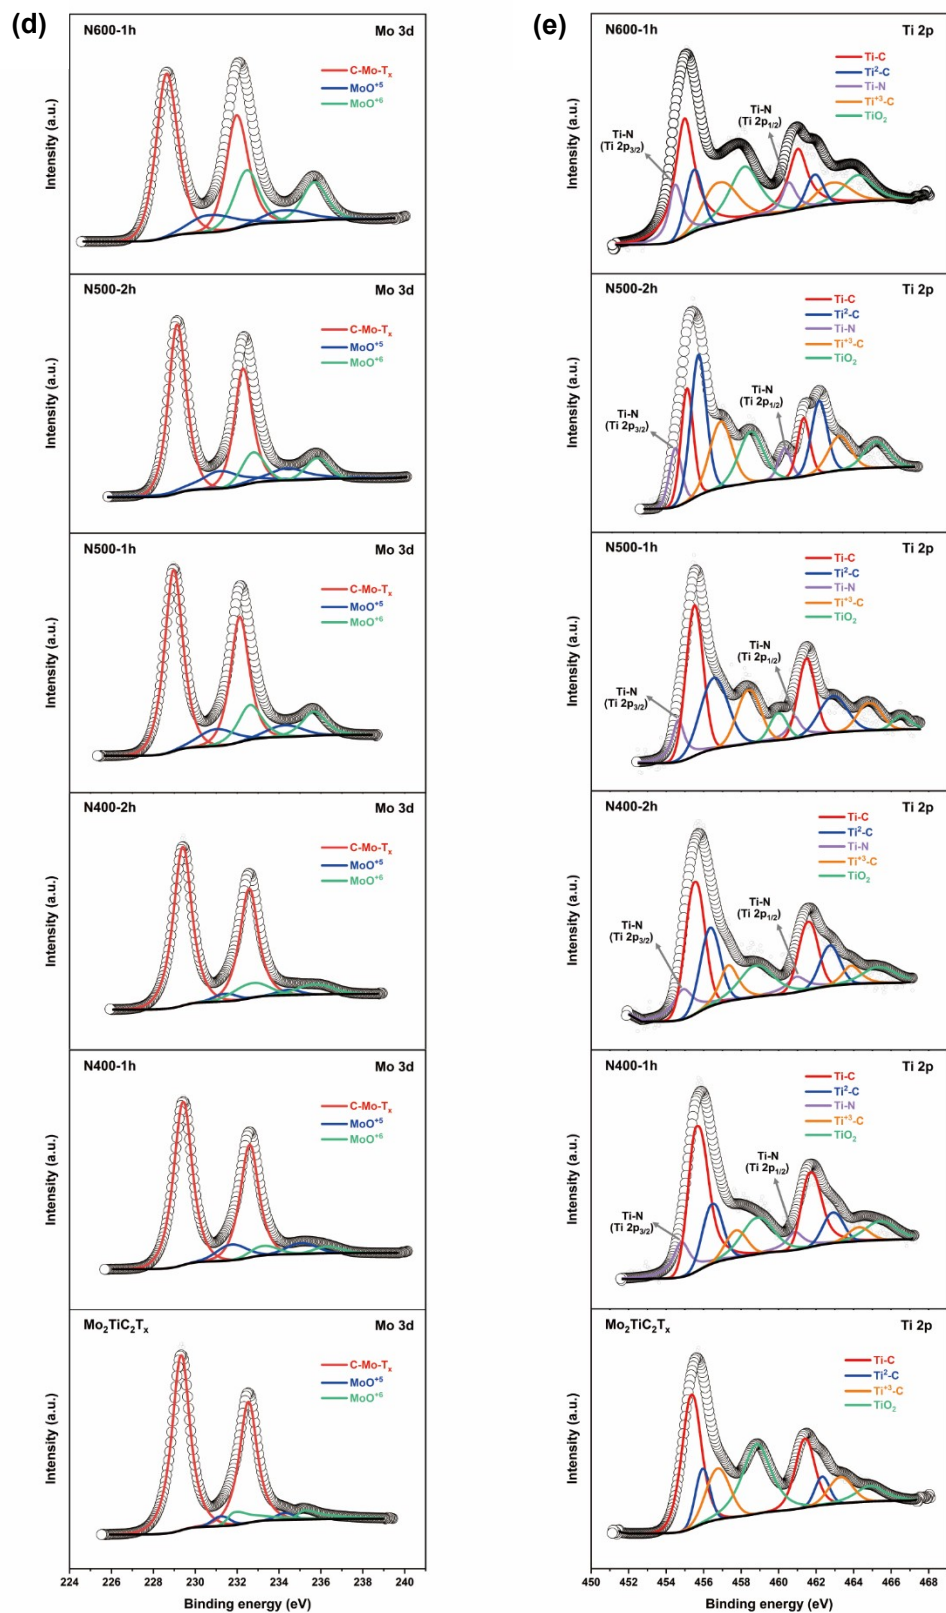

**Figure S4.** High-resolution XPS spectra deconvolution of (a) N 1s, (b) C 1s, (c) O 1s, (d) Mo 3d and (e) Ti 2p region for N-600, 500, 400 and Mo<sub>2</sub>TiC<sub>2</sub>T<sub>x</sub> respectively.



**Table S2.** Summary of global atomic compositions of the high resolution XPS region fittings of  $\text{Mo}_2\text{TiC}_2\text{T}_x$

| Region | Be[eV] | FWHM[eV] | Atomic % | Weight % | Assigned to                      | Reference |
|--------|--------|----------|----------|----------|----------------------------------|-----------|
| C1s    | 282.85 | 0.82     | 9.5      | 2.88     | C-Mo/Ti-T <sub>x</sub>           | [5]       |
|        | 284.84 | 1.8      | 19.8     | 6        | C-C                              | [5]       |
|        | 286.16 | 1.11     | 5.71     | 1.73     | C-C/CH <sub>x</sub>              | [5]       |
|        | 287.28 | 1.23     | 1.44     | 0.44     | C-O                              | [7]       |
|        | 288.68 | 2.04     | 1.26     | 0.38     | COO                              | [5]       |
| Mo3d   | 229.31 | 1.01     | 12.28    | 29.73    | C-Mo-T <sub>x</sub>              | [6]       |
|        | 232.53 | 1.01     | 12.3     | 29.76    |                                  |           |
|        | 231.24 | 0.99     | 0.58     | 1.4      | MoO <sup>+5</sup>                | [5]       |
|        | 234.29 | 0.99     | 0.58     | 1.4      |                                  |           |
|        | 231.88 | 1.36     | 1.34     | 3.25     | MoO <sup>+6</sup>                | [5]       |
|        | 235.23 | 1.36     | 1.34     | 3.25     |                                  |           |
| O1s    | 529.93 | 1.01     | 9.82     | 3.97     | Mo/Ti-oxide/C-Mo(I) <sub>x</sub> | [5]       |
|        | 530.7  | 1.98     | 6.62     | 2.67     | C-Mo-O(II) <sub>x</sub>          | [5]       |
|        | 532.34 | 1.49     | 1.99     | 0.8      | C-Mo-(OH) <sub>x</sub>           | [5]       |
|        | 533.49 | 2        | 1.29     | 0.52     | H <sub>2</sub> O <sub>ads</sub>  | [5]       |
| Ti2p   | 455.33 | 1.23     | 2.16     | 2.98     | Ti-C                             | [5]       |
|        | 461.38 | 1.23     | 2.4      | 3.32     |                                  |           |
|        | 455.95 | 0.9      | 0.62     | 0.86     | Ti <sup>2+</sup> -C              | [5]       |
|        | 462.32 | 0.9      | 0.69     | 0.95     |                                  |           |
|        | 456.76 | 1.5      | 0.96     | 1.32     | Ti <sup>+3</sup> -C              | [5]       |
|        | 463.31 | 1.5      | 1.06     | 1.47     |                                  |           |
|        | 458.82 | 1.83     | 1.75     | 2.43     | TiO <sub>2</sub>                 | [5]       |
|        | 464.87 | 1.83     | 0.84     | 1.17     |                                  |           |

**Table S3.** Summary of global atomic compositions of the high resolution XPS region fittings of N600-1h

| Region                  | Be[eV] | FWHM[eV] | Atomic % | Weight %         | Assigned to                              | Reference |
|-------------------------|--------|----------|----------|------------------|------------------------------------------|-----------|
| C1s                     | 283.02 | 1.27     | 6.84     | 2.64             | C-Mo/Ti-T <sub>x</sub>                   | [5]       |
|                         | 284.6  | 1.12     | 13.84    | 5.34             | C-C                                      | [5]       |
|                         | 285.23 | 1.01     | 9.75     | 3.76             | C-C/CH <sub>x</sub>                      | [5]       |
|                         | 285.98 | 0.83     | 2.16     | 0.83             | C-N                                      | [7]       |
|                         | 286.58 | 1.24     | 2.34     | 0.9              | C-O                                      | [5]       |
| Mo3d                    | 229.35 | 1.17     | 6        | 18.49            | C-Mo-T <sub>x</sub>                      | [6]       |
|                         | 232.5  | 1.17     | 6        | 18.5             |                                          |           |
|                         | 231.24 | 2.36     | 1.23     | 3.78             | MoO <sup>+5</sup>                        | [5]       |
|                         | 234.59 | 2.36     | 1.23     | 3.79             |                                          |           |
|                         | 232.95 | 1.32     | 2.24     | 6.9              | MoO <sup>+6</sup>                        | [5]       |
|                         | 236    | 1.32     | 2.24     | 6.9              |                                          |           |
| N1s/Mo3p <sub>3/2</sub> | 395.14 | 2.1      | 10.59    | 4.77             | Mo-N (Mo 3p <sub>3/2</sub> )             | [6]       |
|                         | 397.08 | 1.3      | 5.69     | 2.56             | Mo-N (N1s)                               | [6]       |
|                         | 398.37 | 2.22     | 5.72     | 2.58             | MoO <sub>3</sub> (Mo 3p <sub>3/2</sub> ) | [6]       |
|                         | 399.95 | 3.5      | 3.43     | 1.54             | C-N (N 1s)                               | [7]       |
| O1s                     | 530.2  | 1.38     | 4.37     | 2.24             | Mo/Ti-oxide/C-Mo(I) <sub>x</sub>         | [5]       |
|                         | 530.94 | 1.52     | 6.5      | 3.34             | C-Mo-O(II) <sub>x</sub>                  | [5]       |
|                         | 532.09 | 1.56     | 2.67     | 1.38             | C-Mo-(OH) <sub>x</sub>                   | [5]       |
|                         | 533.52 | 1.3      | 1.25     | 0.64             | H <sub>2</sub> O <sub>ads</sub>          | [5]       |
| Ti2p                    | 454.45 | 0.87     | 0.34     | 0.53             | Ti-N                                     | [7]       |
|                         | 460.5  | 0.87     | 0.38     | 0.59             |                                          |           |
|                         | 454.98 | 1.23     | 1.01     | 1.55             | Ti-C                                     | [5]       |
|                         | 461.03 | 1.23     | 1.12     | 1.73             |                                          |           |
|                         | 455.49 | 1.05     | 0.35     | 0.54             | Ti <sup>2+</sup> -C                      | [5]       |
|                         | 461.93 | 1.05     | 0.39     | 0.6              |                                          |           |
|                         | 456.76 | 2.12     | 0.5      | 0.77             | Ti <sup>+3</sup> -C                      | [5]       |
|                         | 462.81 | 2.12     | 0.55     | 0.85             |                                          |           |
|                         | 458.17 | 1.93     | 0.6      | 0.92             |                                          |           |
| 464.22                  | 1.93   | 0.67     | 1.03     | TiO <sub>2</sub> | [5]                                      |           |

**Table S4.** Summary of global atomic compositions of the high resolution XPS region fittings of N500-1h

| Region                  | Be[eV] | FWHM[eV] | Atomic % | Weight % | Assigned to                              | Reference |
|-------------------------|--------|----------|----------|----------|------------------------------------------|-----------|
| C1s                     | 282.97 | 0.94     | 6.37     | 2.4      | C-Mo/Ti-T <sub>x</sub>                   | [5]       |
|                         | 284.61 | 1.32     | 16.5     | 6.22     | C-C                                      | [5]       |
|                         | 285.10 | 1.21     | 8.81     | 3.32     | C-C/CH <sub>x</sub>                      | [5]       |
|                         | 286.09 | 1.14     | 3.05     | 1.15     | C-N                                      | [7]       |
|                         | 287.59 | 2        | 1.85     | 0.7      | C-O                                      | [5]       |
| Mo3d                    | 228.96 | 1.04     | 7.03     | 21.17    | C-Mo-T <sub>x</sub>                      | [6]       |
|                         | 232.11 | 1.04     | 7.04     | 21.19    |                                          |           |
|                         | 231.01 | 2        | 1.13     | 3.41     | MoO <sup>+5</sup>                        | [5]       |
|                         | 234.29 | 2        | 1.13     | 3.41     |                                          |           |
|                         | 232.61 | 1.34     | 1.7      | 5.12     | MoO <sup>+6</sup>                        | [5]       |
| 235.66                  | 1.34   | 1.7      | 5.12     |          |                                          |           |
| N1s/Mo3p <sub>3/2</sub> | 394.86 | 1.86     | 10.63    | 4.67     | Mo-N (Mo 3p <sub>3/2</sub> )             | [6]       |
|                         | 396.7  | 1.42     | 7.8      | 3.43     | Mo-N (N1s)                               | [6]       |
|                         | 398.15 | 1.82     | 3.4      | 1.49     | MoO <sub>3</sub> (Mo 3p <sub>3/2</sub> ) | [6]       |
|                         | 399.44 | 2.33     | 2.84     | 1.25     | C-N (N 1s)                               | [7]       |
| O1s                     | 529.75 | 1.3      | 5.7      | 2.86     | Mo/Ti-oxide/C-Mo(I) <sub>x</sub>         | [5]       |
|                         | 530.57 | 1.42     | 3.28     | 1.65     | C-Mo-O(II) <sub>x</sub>                  | [5]       |
|                         | 531.79 | 1.48     | 3.12     | 1.56     | C-Mo-(OH) <sub>x</sub>                   | [5]       |
|                         | 532.75 | 1.93     | 1.54     | 0.77     | H <sub>2</sub> O <sub>ads</sub>          | [5]       |
| Ti2p                    | 454.65 | 0.8      | 0.31     | 0.48     | Ti-N                                     | [7]       |
|                         | 460.85 | 0.8      | 0.35     | 0.53     |                                          |           |
|                         | 455.51 | 1.09     | 1.14     | 1.71     | Ti-C                                     | [5]       |
|                         | 461.49 | 1.09     | 1.26     | 1.9      |                                          |           |
|                         | 456.55 | 1.74     | 0.86     | 1.3      | Ti <sup>2+</sup> -C                      | [5]       |
|                         | 462.91 | 1.74     | 0.96     | 1.44     |                                          |           |
|                         | 458.36 | 1.48     | 0.55     | 0.83     | Ti <sup>+3</sup> -C                      | [5]       |
|                         | 464.81 | 1.48     | 0.6      | 0.91     |                                          |           |
|                         | 459.97 | 1.07     | 0.2      | 0.3      | TiO <sub>2</sub>                         | [5]       |
| 466.52                  | 1.07   | 0.22     | 0.33     |          |                                          |           |

**Table S5.** Summary of global atomic compositions of the high resolution XPS region fittings of N400-1h

| Region                  | Be[eV] | FWHM[eV] | Atomic % | Weight %         | Assigned to                              | Reference |
|-------------------------|--------|----------|----------|------------------|------------------------------------------|-----------|
| C1s                     | 282.99 | 0.90     | 7.16     | 2.97             | C-Mo/Ti-T <sub>x</sub>                   | [5]       |
|                         | 284.63 | 1.16     | 20.92    | 8.69             | C-C                                      | [5]       |
|                         | 285.16 | 1.07     | 14.31    | 5.94             | C-C/CH <sub>x</sub>                      | [5]       |
|                         | 286.03 | 1.2      | 3.74     | 1.55             | C-N                                      | [7]       |
|                         | 287.03 | 0.95     | 1.1      | 0.46             | C-O                                      | [5]       |
| Mo3d                    | 229.41 | 1.05     | 6.79     | 22.53            | C-Mo-T <sub>x</sub>                      | [6]       |
|                         | 232.58 | 1.05     | 6.8      | 22.55            |                                          |           |
|                         | 231.70 | 1.63     | 0.85     | 2.84             | MoO <sup>+5</sup>                        | [5]       |
|                         | 235.05 | 1.63     | 0.86     | 2.84             |                                          |           |
|                         | 233.21 | 1.65     | 0.59     | 1.95             | MoO <sup>+6</sup>                        | [5]       |
|                         | 236.26 | 1.65     | 0.59     | 1.95             |                                          |           |
| N1s/Mo3p <sub>3/2</sub> | 394.56 | 1.16     | 3.26     | 1.58             | Mo-N (Mo 3p <sub>3/2</sub> )             | [6]       |
|                         | 395.45 | 1.17     | 4.75     | 2.3              | Mo-N (N1s)                               | [6]       |
|                         | 396.68 | 1.84     | 5.87     | 2.84             | MoO <sub>3</sub> (Mo 3p <sub>3/2</sub> ) | [6]       |
|                         | 398.59 | 3.42     | 3.88     | 1.88             | C-N (N 1s)                               | [7]       |
| O1s                     | 530.02 | 1.02     | 4.88     | 2.70             | Mo/Ti-oxide/C-Mo(I) <sub>x</sub>         | [5]       |
|                         | 530.56 | 1.23     | 2.12     | 1.17             | C-Mo-O(II) <sub>x</sub>                  | [5]       |
|                         | 532.35 | 1.56     | 3.98     | 2.21             | C-Mo-(OH) <sub>x</sub>                   | [5]       |
|                         | 533.23 | 1.93     | 2.20     | 1.22             | H <sub>2</sub> O <sub>ads</sub>          | [5]       |
| Ti2p                    | 454.82 | 1.1      | 0.34     | 0.57             | Ti-N                                     | [7]       |
|                         | 460.87 | 1.1      | 0.39     | 0.64             |                                          |           |
|                         | 455.62 | 1.27     | 1.31     | 2.17             | Ti-C                                     | [5]       |
|                         | 461.67 | 1.27     | 1.46     | 2.42             |                                          |           |
|                         | 456.44 | 1.26     | 0.5      | 0.83             | Ti <sup>2+</sup> -C                      | [5]       |
|                         | 462.88 | 1.26     | 0.56     | 0.93             |                                          |           |
|                         | 457.74 | 1.33     | 0.24     | 0.4              | Ti <sup>+3</sup> -C                      | [5]       |
|                         | 464.29 | 1.33     | 0.27     | 0.45             |                                          |           |
|                         | 458.83 | 2.02     | 0.51     | 0.85             |                                          |           |
| 465.38                  | 2.02   | 0.57     | 0.95     | TiO <sub>2</sub> | [5]                                      |           |

**Table S6.** Summary of global atomic compositions of the high resolution XPS region fittings of N500-2h

| Region                  | Be[eV] | FWHM[eV] | Atomic % | Weight % | Assigned to                              | Reference |
|-------------------------|--------|----------|----------|----------|------------------------------------------|-----------|
| C1s                     | 282.9  | 0.89     | 6.27     | 2.28     | C-Mo/Ti-T <sub>x</sub>                   | [5]       |
|                         | 284.52 | 1.21     | 16.52    | 6.01     | C-C                                      | [5]       |
|                         | 285.08 | 1        | 7.95     | 2.89     | C-C/CH <sub>x</sub>                      | [5]       |
|                         | 285.74 | 1.28     | 3.36     | 1.22     | C-N                                      | [7]       |
|                         | 286.77 | 2.47     | 2.81     | 1.02     | C-O                                      | [5]       |
| Mo3d                    | 229.12 | 1.02     | 6.87     | 20       | C-Mo-T <sub>x</sub>                      | [6]       |
|                         | 232.27 | 1.02     | 6.88     | 20.02    |                                          |           |
|                         | 231.12 | 2.18     | 1.78     | 5.17     | MoO <sup>+5</sup>                        | [5]       |
|                         | 234.33 | 2.18     | 1.78     | 5.19     |                                          |           |
|                         | 232.77 | 1.29     | 1.46     | 4.23     | MoO <sup>+6</sup>                        | [5]       |
|                         | 235.82 | 1.29     | 1.46     | 4.24     |                                          |           |
| N1s/Mo3p <sub>3/2</sub> | 395.04 | 2.01     | 12.31    | 5.23     | Mo-N (Mo 3p <sub>3/2</sub> )             | [6]       |
|                         | 396.95 | 1.22     | 6.75     | 2.87     | Mo-N (N1s)                               | [6]       |
|                         | 397.99 | 1.84     | 4.39     | 1.86     | MoO <sub>3</sub> (Mo 3p <sub>3/2</sub> ) | [6]       |
|                         | 399.14 | 2.28     | 3.86     | 1.64     | C-N (N 1s)                               | [7]       |
| O1s                     | 530.03 | 1.15     | 3.85     | 1.87     | Mo/Ti-oxide/C-Mo(I) <sub>x</sub>         | [5]       |
|                         | 530.72 | 1.32     | 4.6      | 2.23     | C-Mo-O(II) <sub>x</sub>                  | [5]       |
|                         | 532.15 | 1.83     | 6.02     | 2.92     | C-Mo-(OH) <sub>x</sub>                   | [5]       |
|                         | 533.53 | 1.97     | 1.09     | 0.53     | H <sub>2</sub> O <sub>ads</sub>          | [5]       |
| Ti2p                    | 455.02 | 0.7      | 0.27     | 0.42     | Ti-N                                     | [7]       |
|                         | 460.24 | 0.7      | 0.3      | 0.47     |                                          |           |
|                         | 455.57 | 0.7      | 0.53     | 0.81     | Ti-C                                     | [5]       |
|                         | 461.14 | 0.7      | 0.59     | 0.9      |                                          |           |
|                         | 456.12 | 0.88     | 0.83     | 1.27     | Ti <sup>2+</sup> -C                      | [5]       |
|                         | 461.89 | 0.88     | 0.92     | 1.41     |                                          |           |
|                         | 457.18 | 1.25     | 0.55     | 0.85     | Ti <sup>+3</sup> -C                      | [5]       |
|                         | 462.84 | 1.25     | 0.61     | 0.94     |                                          |           |
|                         | 458.62 | 1.37     | 0.46     | 0.71     | TiO <sub>2</sub>                         | [5]       |
|                         | 464.6  | 1.37     | 0.52     | 0.79     |                                          |           |

**Table S7.** Summary of global atomic compositions of the high resolution XPS region fittings of N400-2h

| Region                  | Be[eV] | FWHM[eV] | Atomic % | Weight % | Assigned to                              | Reference |
|-------------------------|--------|----------|----------|----------|------------------------------------------|-----------|
| C1s                     | 283    | 0.97     | 7.42     | 2.91     | C-Mo/Ti-T <sub>x</sub>                   | [5]       |
|                         | 284.41 | 1.24     | 15.2     | 5.95     | C-C                                      | [5]       |
|                         | 284.97 | 1.07     | 11.11    | 4.35     | C-C/CH <sub>x</sub>                      | [5]       |
|                         | 285.66 | 1.13     | 4.18     | 1.64     | C-N                                      | [7]       |
|                         | 286.41 | 2.24     | 2.74     | 1.07     | C-O                                      | [5]       |
| Mo3d                    | 229.39 | 1.05     | 7.26     | 22.72    | C-Mo-T <sub>x</sub>                      | [6]       |
|                         | 232.56 | 1.05     | 7.27     | 22.75    |                                          |           |
|                         | 231.4  | 1.29     | 0.36     | 1.17     | MoO <sup>+5</sup>                        | [5]       |
|                         | 234.45 | 1.29     | 0.36     | 1.17     |                                          |           |
|                         | 232.64 | 2.02     | 1.14     | 3.57     | MoO <sup>+6</sup>                        | [5]       |
|                         | 235.69 | 2.02     | 1.14     | 3.56     |                                          |           |
| N1s/Mo3p <sub>3/2</sub> | 394.38 | 1.81     | 5.82     | 3.02     | Mo-N (Mo 3p <sub>3/2</sub> )             | [6]       |
|                         | 395.5  | 1.81     | 11.69    | 5.34     | Mo-N (N1s)                               | [6]       |
|                         | 396.91 | 2.08     | 6.57     | 3        | MoO <sub>3</sub> (Mo 3p <sub>3/2</sub> ) | [6]       |
|                         | 399.38 | 1.97     | 1.62     | 0.74     | C-N (N 1s)                               | [7]       |
| O1s                     | 530    | 1.07     | 5.32     | 2.77     | Mo/Ti-oxide/C-Mo(I) <sub>x</sub>         | [5]       |
|                         | 530.86 | 1.41     | 2.25     | 1.17     | C-Mo-O(II) <sub>x</sub>                  | [5]       |
|                         | 532.32 | 1.46     | 5.69     | 2.97     | C-Mo-(OH) <sub>x</sub>                   | [5]       |
|                         | 533.82 | 2        | 1.18     | 0.62     | H <sub>2</sub> O <sub>ads</sub>          | [5]       |
| Ti2p                    | 454.9  | 1.3      | 0.34     | 0.56     | Ti-N                                     | [7]       |
|                         | 460.95 | 1.3      | 0.38     | 0.62     |                                          |           |
|                         | 455.5  | 1.23     | 1.08     | 1.77     | Ti-C                                     | [5]       |
|                         | 461.55 | 1.23     | 1.2      | 1.97     |                                          |           |
|                         | 456.35 | 1.26     | 0.66     | 1.08     | Ti <sup>2+</sup> -C                      | [5]       |
|                         | 462.73 | 1.26     | 0.73     | 1.2      |                                          |           |
|                         | 457.32 | 1.16     | 0.3      | 0.49     | Ti <sup>+3</sup> -C                      | [5]       |
|                         | 463.85 | 1.16     | 0.34     | 0.55     |                                          |           |
|                         | 458.71 | 2        | 0.47     | 0.78     | TiO <sub>2</sub>                         | [5]       |
| 465.26                  | 2      | 0.53     | 0.86     |          |                                          |           |

**Table S8.** The Hall effect and electrical properties of Mo<sub>2</sub>TiC<sub>2</sub>

| Temperature (K) | Conductivity type | Carrier areal density (cm <sup>-2</sup> ) | Carrier volume density (cm <sup>-3</sup> ) | Resistivity (Ω·cm) | Hall coefficient (cm <sup>3</sup> /C) | Carrier mobility (cm <sup>2</sup> /Vs) |
|-----------------|-------------------|-------------------------------------------|--------------------------------------------|--------------------|---------------------------------------|----------------------------------------|
| 100             | n                 | 2.20948E18                                | 1.82601E21                                 | 0.00194            | -0.00342                              | 1.76312                                |
| 200             | n                 | 2.36775E18                                | 1.95682E21                                 | 0.00239            | -0.00319                              | 1.33514                                |
| 300             | n                 | 2.50084E18                                | 2.06681E21                                 | 0.00298            | -0.00302                              | 1.01376                                |
| 400             | n                 | 2.71187E18                                | 2.24122E21                                 | 0.00368            | -0.00278                              | 0.75651                                |

**Table S9.** The Hall effect and electrical properties of Mo<sub>2</sub>TiC<sub>2</sub>-N400-1h

| Temperature (K) | Conductivity type | Carrier areal density (cm <sup>-2</sup> ) | Carrier volume density (cm <sup>-3</sup> ) | Resistivity (Ω·cm) | Hall coefficient (cm <sup>3</sup> /C) | Carrier mobility (cm <sup>2</sup> /Vs) |
|-----------------|-------------------|-------------------------------------------|--------------------------------------------|--------------------|---------------------------------------|----------------------------------------|
| 100             | n                 | 1.66662E19                                | 5.41752E21                                 | 0.00113            | -0.00277                              | 2.03618                                |
| 200             | n                 | 1.63014E19                                | 5.29898E21                                 | 0.00139            | -0.00284                              | 1.69532                                |
| 300             | n                 | 1.64414E19                                | 5.34449E21                                 | 0.00174            | -0.00281                              | 1.34295                                |
| 400             | n                 | 1.73994E19                                | 5.6559E21                                  | 0.00214            | -0.00266                              | 1.03546                                |

**Table S10.** The Hall effect and electrical properties of Mo<sub>2</sub>TiC<sub>2</sub>- N500-1h

| Temperature (K) | Conductivity type | Carrier areal density (cm <sup>-2</sup> ) | Carrier volume density (cm <sup>-3</sup> ) | Resistivity (Ω·cm) | Hall coefficient (cm <sup>3</sup> /C) | Carrier mobility (cm <sup>2</sup> /Vs) |
|-----------------|-------------------|-------------------------------------------|--------------------------------------------|--------------------|---------------------------------------|----------------------------------------|
| 100             | n                 | 1.90015E19                                | 5.56818E21                                 | 9.44444E-4         | -0.00173                              | 1.35142                                |
| 200             | n                 | 1.90558E19                                | 5.58412E21                                 | 0.00116            | -0.00172                              | 1.08764                                |
| 300             | n                 | 2.23638E19                                | 6.55348E21                                 | 0.00145            | -0.00147                              | 0.76458                                |
| 400             | n                 | 3.04281E19                                | 8.91665E21                                 | 0.00178            | -0.00108                              | 0.49373                                |

**Table S11.** The Hall effect and electrical properties of Mo<sub>2</sub>TiC<sub>2</sub>- N600-1h



| Temperature (K) | Conductivity type | Carrier areal density (cm <sup>-2</sup> ) | Carrier volume density (cm <sup>-3</sup> ) | Resistivity (Ω·cm) | Hall coefficient (cm <sup>3</sup> /C) | Carrier mobility (cm <sup>2</sup> /Vs) |
|-----------------|-------------------|-------------------------------------------|--------------------------------------------|--------------------|---------------------------------------|----------------------------------------|
| 100             | n                 | 1.50392E19                                | 6.65453E21                                 | 7.99364E-4         | -9.37707E-4                           | 1.17307                                |
| 200             | n                 | 1.81028E19                                | 8.01009E21                                 | 9.45035E-4         | -7.79017E-4                           | 0.82433                                |
| 300             | n                 | 2.21135E19                                | 9.78474E21                                 | 0.00111            | -6.37728E-4                           | 0.57682                                |
| 400             | n                 | 2.82886E19                                | 1.25171E22                                 | 0.00126            | -4.98519E-4                           | 0.39576                                |

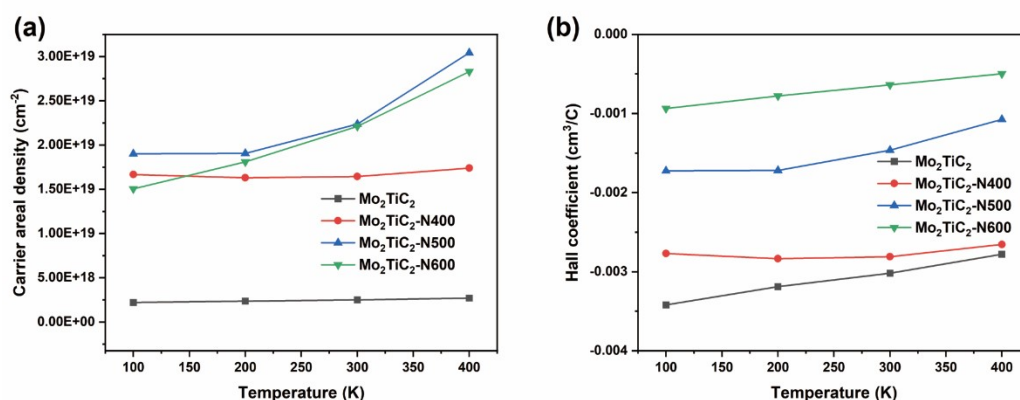

**Figure S5.** (a) Carrier areal density and (b) Hall coefficient and of Mo<sub>2</sub>TiC<sub>2</sub>, Mo<sub>2</sub>TiC<sub>2</sub>-N400-1h, Mo<sub>2</sub>TiC<sub>2</sub>-N500-1h and Mo<sub>2</sub>TiC<sub>2</sub>-N600-1h.

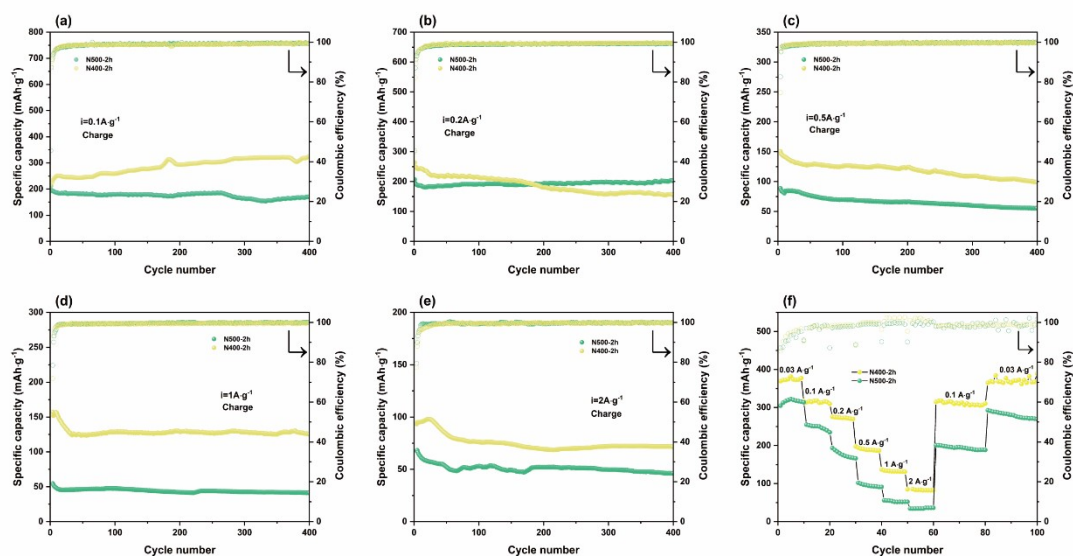

**Figure S6.** Cycling performances of Mo<sub>2</sub>TiC<sub>2</sub>T<sub>x</sub> and N400/500-2h at (a) 0.1 A·g<sup>-1</sup>, (b) 0.2 A·g<sup>-1</sup>, (c) 0.5 A·g<sup>-1</sup>, (d) 1 A·g<sup>-1</sup> and (e) 2 A·g<sup>-1</sup>. (f) Rate capability testing at 0.1, 0.2, 0.5, 1, 2 A·g<sup>-1</sup> for 10 cycles at each rate for N400/500-2h samples.

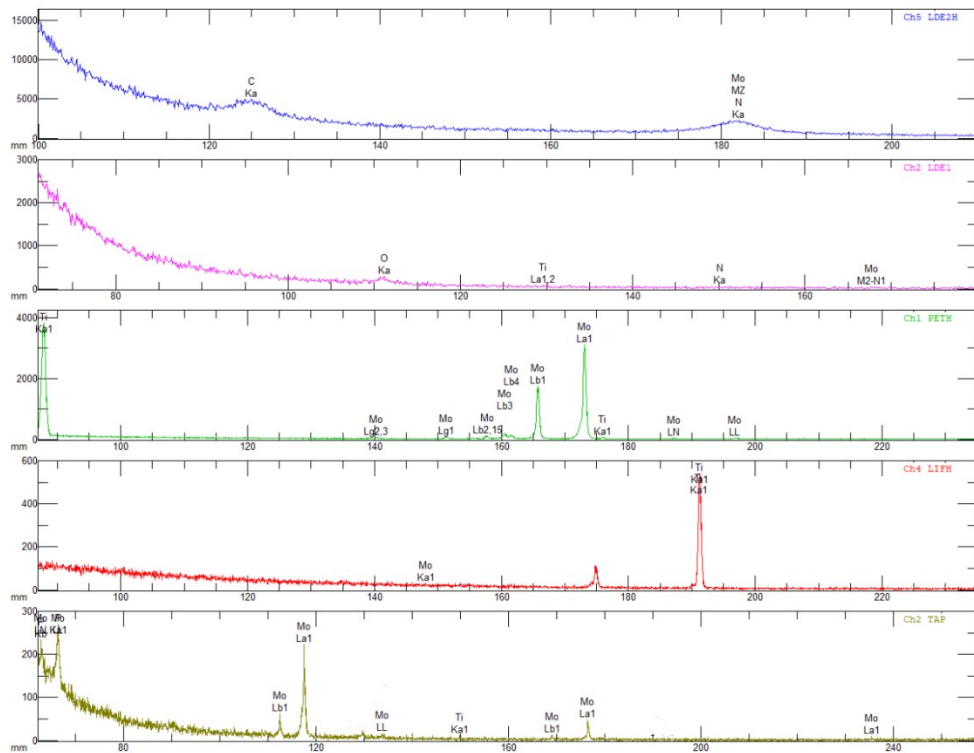

(a)

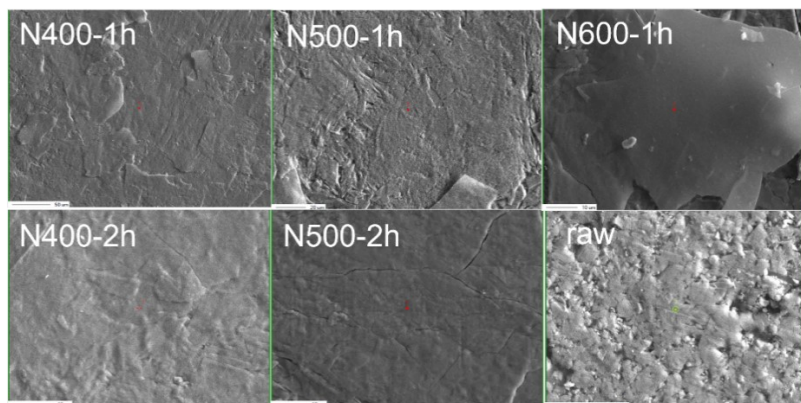

(b)

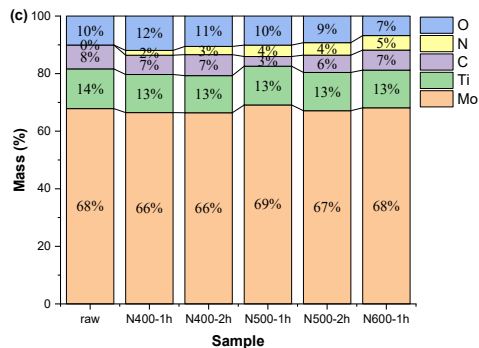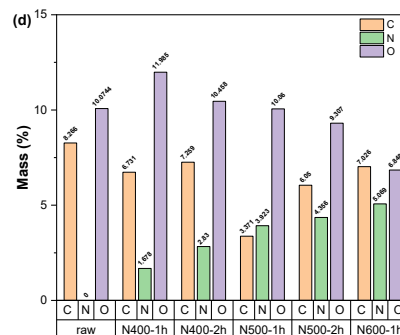

**Figure S7.** (a) The spectrum of N400-1h. (b) The carbon, nitrogen and oxygen atomic fraction of all samples. (c) The all-element mass fraction of all samples. (d) The carbon, nitrogen and oxygen mass fraction of all samples.

**Table S12.** Summary of global atomic compositions of the high resolution XPS region fittings of N400-1h at 0.01 V

| Region                  | Be[eV] | FWHM[eV] | Atomic % | Weight % | Assigned to                                             | Reference |
|-------------------------|--------|----------|----------|----------|---------------------------------------------------------|-----------|
| C1s                     | 284.8  | 1.45     | 8.58     | 7.31     | C-C/CH <sub>x</sub>                                     | [5]       |
|                         | 286.53 | 1.34     | 0.97     | 0.83     | C-O                                                     | [5]       |
|                         | 288.47 | 1.77     | 3.29     | 2.8      | C-OO                                                    | [7]       |
|                         | 289.78 | 1.23     | 9.56     | 8.15     | CO <sub>3</sub>                                         | [9]       |
| Mo3d                    | 231.1  | 1.96     | 0.15     | 0.99     | MoO <sup>+4</sup> /Mo(OH) <sub>x</sub>                  | [10]      |
|                         | 234.15 | 1.96     | 0.15     | 1        |                                                         |           |
|                         | 232.51 | 1.08     | 0.91     | 6.19     | MoO <sup>+5</sup>                                       | [5]       |
|                         | 235.65 | 1.08     | 0.88     | 5.97     |                                                         |           |
|                         | 232.9  | 1.31     | 0.08     | 0.55     | MoO <sup>+6</sup>                                       | [5]       |
|                         | 236.06 | 1.31     | 0.08     | 0.55     |                                                         |           |
| N1s/Mo3p <sub>3/2</sub> | 394.39 | 2.08     | 0.17     | 0.17     | Mo-N (Mo 3p <sub>3/2</sub> )                            | [6]       |
|                         | 396.32 | 2.06     | 0.58     | 0.58     | Mo/Ti-N (N1s)                                           | [6]       |
|                         | 398.15 | 2.04     | 2.31     | 2.3      | MoO <sub>3</sub> (Mo 3p <sub>3/2</sub> )                | [6]       |
|                         | 399.62 | 2.24     | 0.84     | 0.83     | C-N (N 1s)                                              | [7]       |
| O1s                     | 530.45 | 1.23     | 5.4      | 6.13     | Li <sub>2</sub> O/Mo/Ti-oxide                           | [11]      |
|                         | 531.48 | 0.94     | 11.87    | 13.47    | LiOH/C-Mo-O(II) <sub>x</sub>                            | [12]      |
|                         | 532.04 | 1.38     | 24.14    | 27.39    | Li <sub>2</sub> CO <sub>3</sub> /C-Mo-(OH) <sub>x</sub> | [9]       |
| Li1s                    | 54.13  | 1.67     | 2.98     | 1.46     | Li <sub>2</sub> O                                       | [11]      |
|                         | 54.83  | 1.02     | 7.6      | 3.74     | LiOH                                                    | [12]      |
|                         | 55.4   | 1.33     | 19.46    | 9.58     | Li <sub>2</sub> CO <sub>3</sub>                         | [9]       |

**Table S13.** Summary of global atomic compositions of the high resolution XPS region fittings of N400-1h at 1.39 V

| Region                  | Be[eV] | FWHM[eV] | Atomic % | Weight % | Assigned to                                             | Reference |
|-------------------------|--------|----------|----------|----------|---------------------------------------------------------|-----------|
| C1s                     | 284.8  | 1.44     | 8.79     | 7.51     | C-C/CH <sub>x</sub>                                     | [5]       |
|                         | 286.64 | 1.04     | 0.45     | 0.38     | C-O                                                     | [5]       |
|                         | 288.71 | 1.76     | 3.86     | 3.3      | C-OO                                                    | [7]       |
|                         | 289.86 | 1.21     | 8.96     | 7.66     | CO <sub>3</sub>                                         | [9]       |
| Mo3d                    | 231.1  | 2.12     | 0.11     | 0.77     | MoO <sup>+4</sup> /Mo(OH) <sub>x</sub>                  | [10]      |
|                         | 234.15 | 2.12     | 0.11     | 0.77     |                                                         |           |
|                         | 232.51 | 1        | 0.71     | 4.88     | MoO <sup>+5</sup>                                       | [5]       |
|                         | 235.64 | 1        | 0.72     | 4.89     |                                                         |           |
|                         | 232.9  | 0.86     | 0.29     | 1.96     | MoO <sup>+6</sup>                                       | [5]       |
|                         | 236.06 | 0.86     | 0.29     | 1.96     |                                                         |           |
| N1s/Mo3p <sub>3/2</sub> | 394.46 | 3.12     | 0.36     | 0.36     | Mo-N (Mo 3p <sub>3/2</sub> )                            | [6]       |
|                         | 396.43 | 1.95     | 0.52     | 0.51     | Mo/Ti-N (N1s)                                           | [6]       |
|                         | 398.26 | 2.15     | 2.57     | 2.56     | MoO <sub>3</sub> (Mo 3p <sub>3/2</sub> )                | [6]       |
|                         | 400.15 | 1.96     | 0.57     | 0.57     | C-N (N 1s)                                              | [7]       |
| O1s                     | 530.3  | 1.29     | 4.43     | 5.04     | Li <sub>2</sub> O/Mo/Ti-oxide                           | [11]      |
|                         | 531.43 | 1.14     | 14.52    | 16.54    | LiOH/C-Mo-O(II) <sub>x</sub>                            | [12]      |
|                         | 532.03 | 1.31     | 22.1     | 25.18    | Li <sub>2</sub> CO <sub>3</sub> /C-Mo-(OH) <sub>x</sub> | [9]       |
| Li1s                    | 54.13  | 1.34     | 1.72     | 0.85     | Li <sub>2</sub> O                                       | [11]      |
|                         | 54.83  | 1.02     | 9.59     | 4.74     | LiOH                                                    | [12]      |
|                         | 55.4   | 1.25     | 19.33    | 9.55     | Li <sub>2</sub> CO <sub>3</sub>                         | [9]       |

**Table S14.** Summary of global atomic compositions of the high resolution XPS region fittings of N400-1h at 3 V

| Region                  | Be[eV] | FWHM[eV] | Atomic % | Weight % | Assigned to                                             | Reference |
|-------------------------|--------|----------|----------|----------|---------------------------------------------------------|-----------|
| C1s                     | 284.8  | 1.35     | 10.68    | 10.23    | C-C/CH <sub>x</sub>                                     | [5]       |
|                         | 286.41 | 1.49     | 1.07     | 1.02     | C-O                                                     | [5]       |
|                         | 288.59 | 1.52     | 4.12     | 3.95     | C-OO                                                    | [7]       |
|                         | 289.83 | 1.23     | 10.08    | 9.65     | CO <sub>3</sub>                                         | [9]       |
| Mo3d                    | 228.57 | 1.92     | 0.01     | 0.04     | M-O                                                     | [13]      |
|                         | 229.73 | 1.81     | 0.04     | 0.33     | C/N-Mo-T <sub>x</sub>                                   | [6][14]   |
|                         | 232.55 | 1.8      | 0.04     | 0.33     |                                                         |           |
|                         | 231.1  | 1.82     | 0.03     | 0.22     | MoO <sup>+4</sup> /Mo(OH) <sub>x</sub>                  | [10]      |
|                         | 234.21 | 1.82     | 0.03     | 0.22     |                                                         |           |
|                         | 232.52 | 1.22     | 0.1      | 0.76     | MoO <sup>+5</sup>                                       | [5]       |
|                         | 235.63 | 1.22     | 0.1      | 0.76     |                                                         |           |
|                         | 232.91 | 1.08     | 0.09     | 0.71     | MoO <sup>+6</sup>                                       | [5]       |
| 236.06                  | 1.08   | 0.09     | 0.71     |          |                                                         |           |
| N1s/Mo3p <sub>3/2</sub> | 393.7  | 2        | 0.07     | 0.08     | Mo-N (Mo 3p <sub>3/2</sub> )                            | [6]       |
|                         | 395.97 | 2.87     | 0.32     | 0.35     | Mo/Ti-N (N1s)                                           | [6]       |
|                         | 398.21 | 2        | 0.43     | 0.48     | MoO <sub>3</sub> (Mo 3p <sub>3/2</sub> )                | [6]       |
|                         | 399.81 | 2        | 0.22     | 0.24     | C-N (N 1s)                                              | [7]       |
| O1s                     | 530.32 | 1.63     | 3.08     | 3.93     | Li <sub>2</sub> O/Mo/Ti-oxide                           | [11]      |
|                         | 531.36 | 1.09     | 15.86    | 20.23    | LiOH/C-Mo-O(II) <sub>x</sub>                            | [12]      |
|                         | 531.94 | 1.3      | 22.34    | 28.49    | Li <sub>2</sub> CO <sub>3</sub> /C-Mo-(OH) <sub>x</sub> | [9]       |
| Li1s                    | 54.08  | 1.67     | 1.72     | 0.95     | Li <sub>2</sub> O                                       | [11]      |
|                         | 54.79  | 1.03     | 8.87     | 4.91     | LiOH                                                    | [12]      |
|                         | 55.41  | 1.25     | 20.59    | 11.39    | Li <sub>2</sub> CO <sub>3</sub>                         | [9]       |

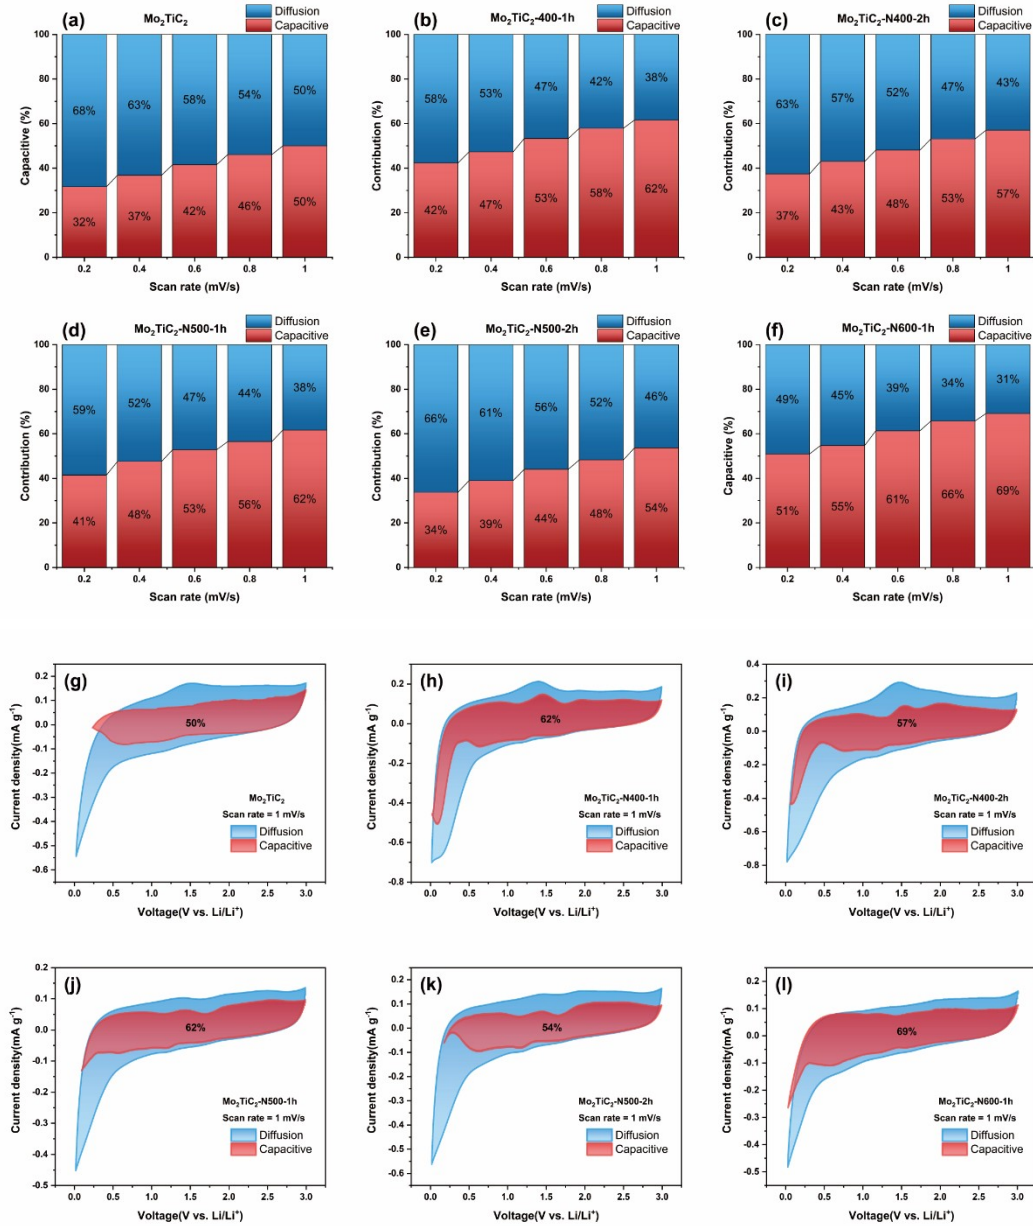

**Figure S8.** Pseudocapacitive and diffusion-controlled capacity contribution ratio for sample (a)(g) raw, (b)(h) N400-1h, (c)(i) N400-2h, (d)(j) N500-1h, (e)(k) N500-2h and (f)(l) N600-1h.

The pseudocapacitive contributions at different scan rates can be calculated by the equations described as below<sup>[8]</sup>:

$$i = k_1 v + k_2 v^{1/2} \quad (1)$$

$$i v^{-1/2} = k_1 v^{1/2} + k_2 \quad (2)$$

where  $k_1$  and  $k_2$  are constants for a given potential. Fig. S4 displays the calculated contribution ratios of two capacity mechanism at different scan rates ranging from 0.2 to 1.0  $mVs^{-1}$ . As the scan rates increase, the capacity contribution ratios of all samples gradually raise. Actually, all

samples are mainly controlled by the Faradic process. The larger capacitive charge storage can be responsible for the high-rate capability of  $\text{Mo}_2\text{TiC}_2\text{T}_x$ . A shaded region related to the surface-controlled capacity contributions is illustrated at the scan rate of  $0.2 \text{ mVs}^{-1}$ , comprising about 46% of the total capacity. Compare to the raw  $\text{Mo}_2\text{TiC}_2\text{T}_x$ , the capacity contribution ratios of nitride samples are all higher.



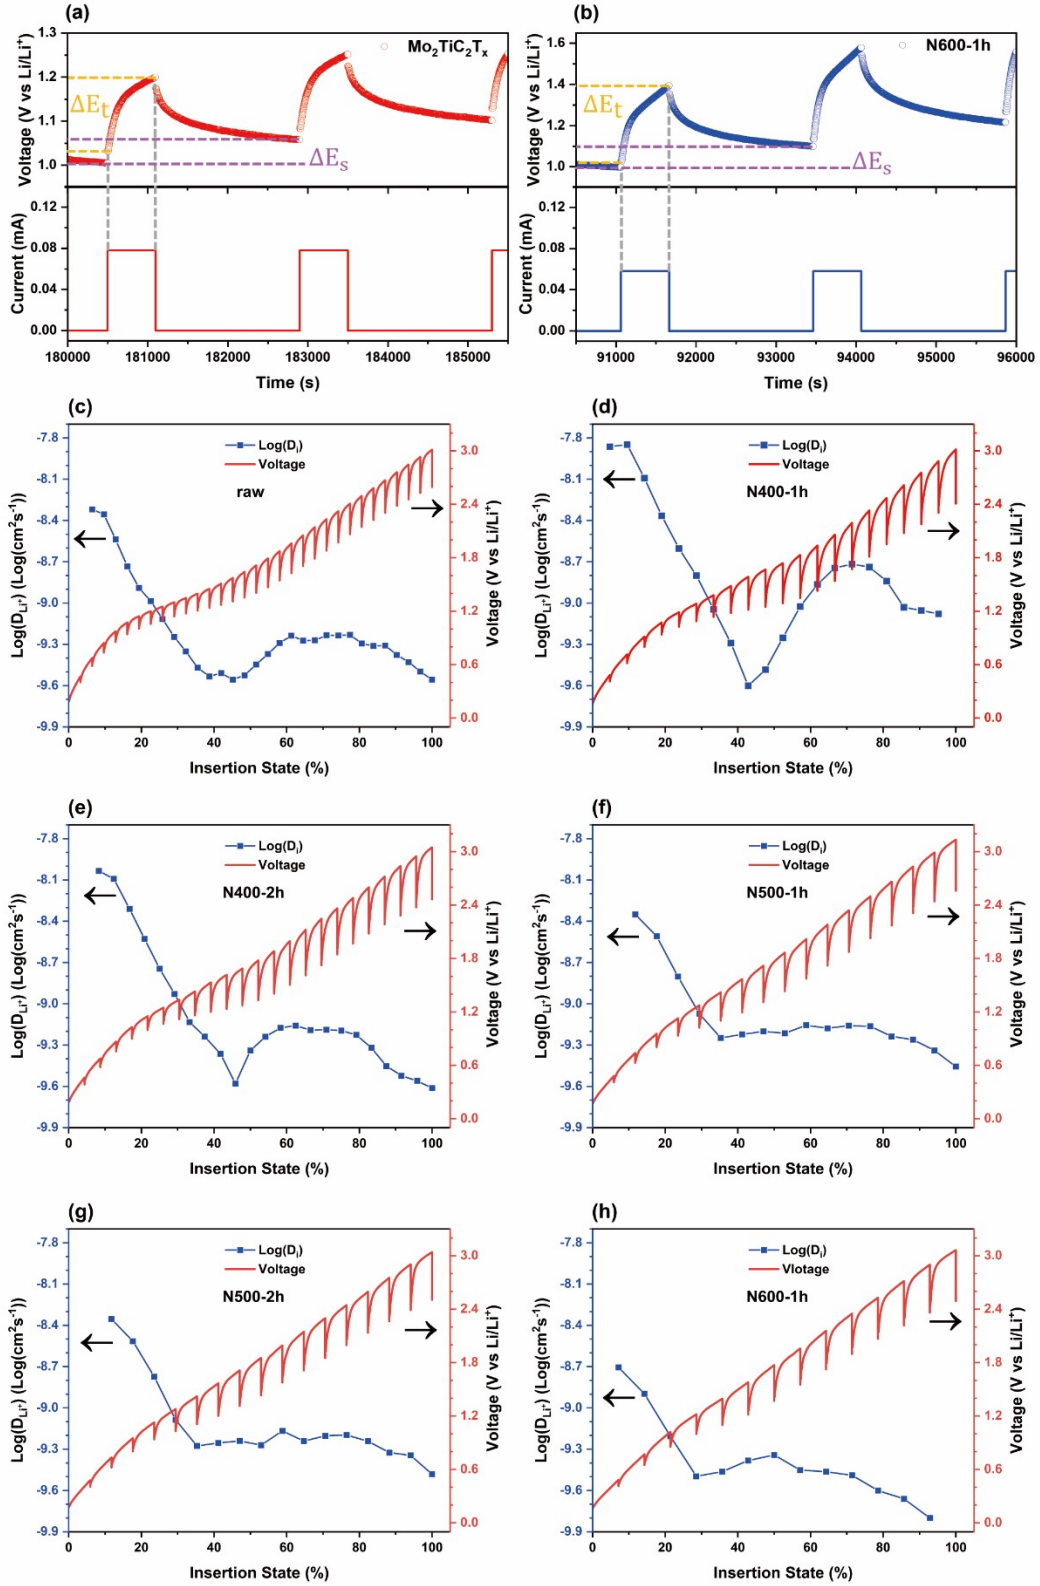

**Figure S9.** GITT voltage curve and current curve for (a)  $\text{Mo}_2\text{TiC}_2\text{T}_x$ , (b) N400-1h during the charge stage. The  $\Delta E_t$  and  $\Delta E_s$  values (Eqs. 9 in main text) are indicated. GITT curves and  $\text{Li}^+$  diffusion coefficient of (c)  $\text{Mo}_2\text{TiC}_2\text{T}_x$ , (d) N400-1h, (e) N400-2h, (f) N500-1h, (g) N500-2h and (h) N600-1h.

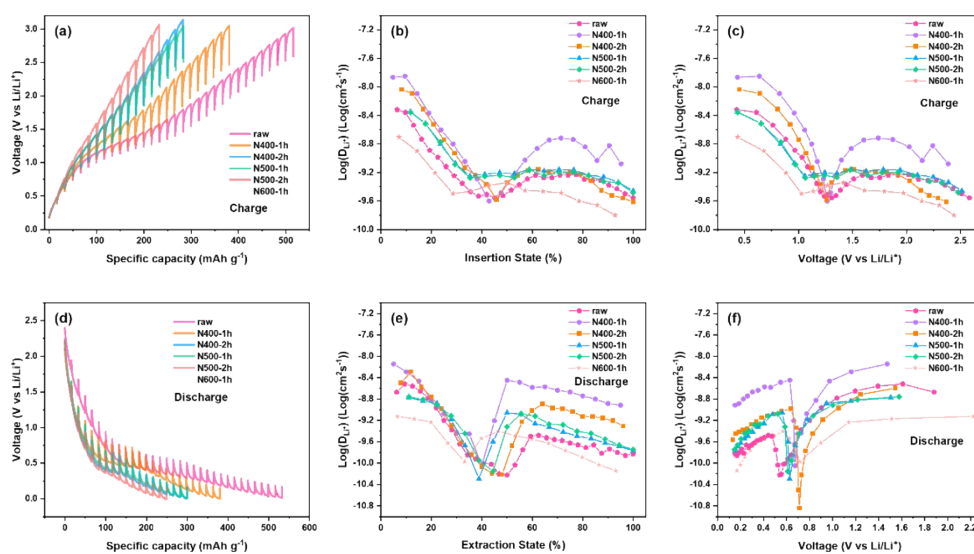

**Figure S10.** GITT voltage and specific capacity curve in (a) charge and (d) discharge process; GITT curve for (b) insertion and (e) extraction state; GITT voltage curve in (c) charge and (f) discharge process.

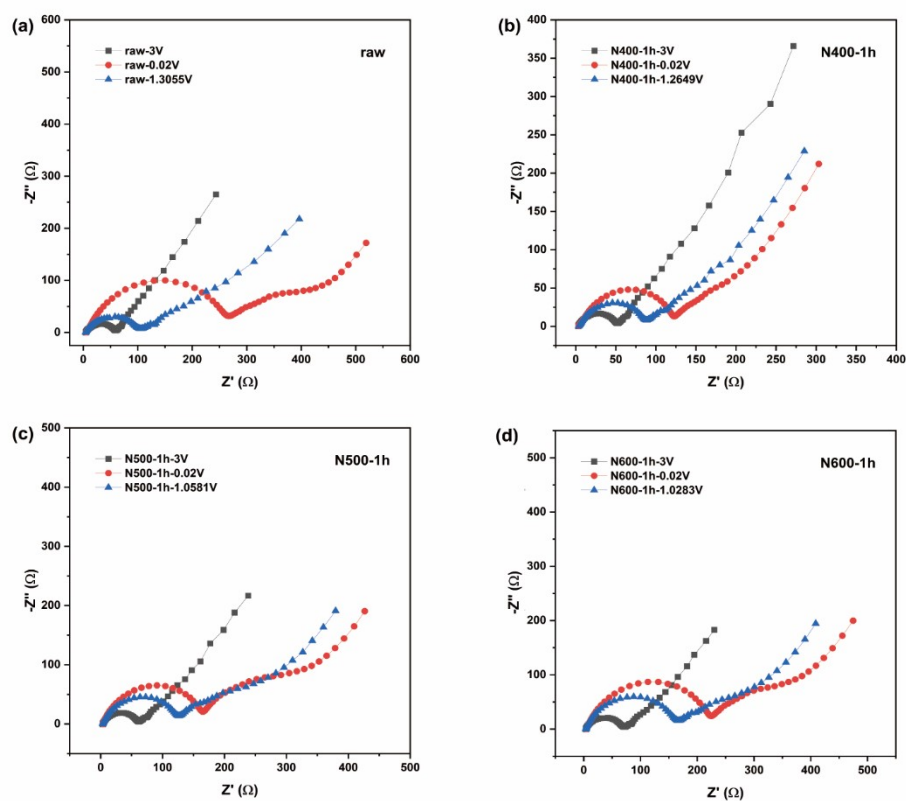

**Figure S11.** EIS at three points of voltage for sample (a)raw, (b)N400-1h, (c)N500-1h, (d)N600-1h.

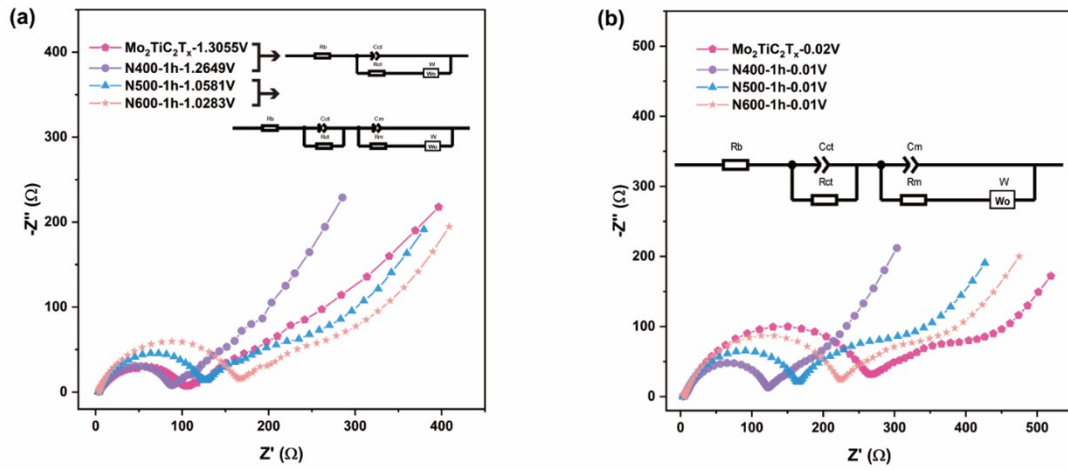

**Figure S12.** The EIS of raw and ammoniated  $\text{Mo}_2\text{TiC}_2\text{T}_x$  MXenes at (a) the specific potential; (b) 0.01 V.

**Table S15.** Simulation results of the EIS spectra of  $\text{Mo}_2\text{TiC}_2\text{T}_x$

| Element               | 3 V     |           | 1.305 V  |           | 0.01 V  |           |
|-----------------------|---------|-----------|----------|-----------|---------|-----------|
|                       | Values  | Error (%) | Values   | Error (%) | Values  | Error (%) |
| $R_b$ ( $\Omega$ )    | 4.2     | 1.8       | 4.1      | 2.80      | 4.4     | 1.4       |
| $R_{ct}$ ( $\Omega$ ) | 54.4    | 3.8       | 92.3     | 1.71      | 226.34  | 2.3       |
| $C_{ct}$ (F)          | 7.0E-05 | 2.1       | 4.3E-05  | 2.09      | 2.6E-05 | 1.0       |
| W-R ( $\Omega$ )      | 2.8     | 1.6       | 2.8      | 2.40      | 64.6    | 1.8       |
| W-T (F)               | 0.013   | 2.4       | 5.6 E-04 | 5.26      | 0.21    | 2.3       |

**Table S16.** Simulation results of the EIS spectra of N400-1h

| Element               | 3 V     |           | 1.265 V |           | 0.01 V  |           |
|-----------------------|---------|-----------|---------|-----------|---------|-----------|
|                       | Values  | Error (%) | Values  | Error (%) | Values  | Error (%) |
| $R_b$ ( $\Omega$ )    | 3.0     | 2.0       | 3.8     | 1.5       | 3.6     | 2.5       |
| $R_{ct}$ ( $\Omega$ ) | 39.6    | 2.0       | 77.7    | 1.6       | 110.3   | 2.4       |
| $C_{ct}$ (F)          | 4.7E-05 | 2.0       | 4.6E-05 | 1.4       | 4.9E-05 | 1.7       |
| W-R ( $\Omega$ )      | 5.5     | 1.6       | 2.1     | 1.5       | 1.3     | 2.5       |
| W-T (F)               | 0.035   | 2.5       | 0.22    | 1.3       | 7.4     | 5.2       |

**Table S17.** Simulation results of the EIS spectra of N500-1h

| Element               | 3 V     |           | 1.058 V |           | 0.01 V  |           |
|-----------------------|---------|-----------|---------|-----------|---------|-----------|
|                       | Values  | Error (%) | Values  | Error (%) | Values  | Error (%) |
| $R_b$ ( $\Omega$ )    | 3.4     | 1.9       | 3.4     | 1.8       | 3.8     | 1.3       |
| $R_{ct}$ ( $\Omega$ ) | 48.8    | 3.1       | 106.5   | 2.1       | 141.4   | 1.3       |
| $C_{ct}$ (F)          | 3.9E-05 | 1.9       | 2.8E-05 | 1.0       | 2.5E-05 | 1.1       |
| $R_m$ ( $\Omega$ )    | -       | -         | 81.1    | 4.1       | 348.4   | 2.7       |
| $C_m$ (F)             | -       | -         | 5.4E-03 | 3.2       | 5.7E-03 | 3.0       |
| W-R ( $\Omega$ )      | 13.1    | 1.8       | 4.9     | 4.5       | 8.3     | 9.0       |
| W-T (F)               | 0.11    | 3.2       | 0.081   | 9.4       | 2.5E-03 | 9.5       |

**Table S18.** Simulation results of the EIS spectra of N600-1h

| Element               | 3 V     |           | 1.028 V |           | 0.01 V  |           |
|-----------------------|---------|-----------|---------|-----------|---------|-----------|
|                       | Values  | Error (%) | Values  | Error (%) | Values  | Error (%) |
| $R_b$ ( $\Omega$ )    | 3.7     | 1.9       | 3.7     | 1.46      | 4.3     | 3.6       |
| $R_{ct}$ ( $\Omega$ ) | 59.1    | 3.1       | 144.5   | 0.81      | 199.7   | 2.1       |
| $C_{ct}$ (F)          | 3.4E-05 | 1.9       | 2.2E-05 | 0.98      | 2.0E-05 | 1.1       |
| $R_m$ ( $\Omega$ )    | -       | -         | 197.4   | 5.9       | 538.9   | 12.1      |
| $C_m$ (F)             | -       | -         | 4.6E-03 | 4.7       | 6.9E-03 | 3.5       |
| W-R ( $\Omega$ )      | 18.3    | 1.9       | 7.6     | 4.0       | 17.1    | 12.2      |
| W-T (F)               | 0.18    | 3.7       | 0.062   | 7.4       | 0.32    | 12.8      |

## Reference

- [1] Asia Sarycheva and Yury Gogotsi, Raman Spectroscopy Analysis of the Structure and Surface Chemistry of  $Ti_3C_2T_x$  MXene, *Chem. Mater.* 2020, 32, 8, 3480–3488.
- [2] J. I. Langford and A. J. C. Wilson, Scherrer after sixty years: A survey and some new results in the determination of crystallite size, *J. Appl. Crystallogr.*, 1978, 11, 102-113.
- [3] Dongsheng Geng, Songlan Yang, Yong Zhang, Jinli Yang, Jian Liu, Ruying Li, Tsun-Kong Sham, Xueliang Sun, Siyu Ye and Shanna Knights, Nitrogen doping effects on the structure of graphene, *Appl. Surf. Sci.*, 2011, 257, 9193-9198.
- [4] Binoy K. Saikia, Rajani K. Boruah and Pradip K. Gogoi, A X-ray diffraction analysis on graphene layers of Assam coal, *J. Chem. Sci.*, 2009, 121, 103-106.
- [5] Joseph Halima, Kevin M. Cook, Per Eklund, Johanna Rosen, Michel W. Barsoum, XPS of cold pressed multilayered and freestanding delaminated 2D thin films of  $Mo_2TiC_2T_z$  and  $Mo_2Ti_2C_3T_z$  (MXenes), *Applied Surface Science*, 2019, 494, 1138-1147.
- [6] Patrick Urbankowski, Babak Anasori, Kanit Hantanasirisakul, Long Yang, Lihua Zhang, Bernard Haines, Steven J. May, Simon J. L. Billinge and Yury Gogotsi, 2D molybdenum and vanadium nitrides synthesized by ammoniation of 2D transition metal carbides (MXenes), *Nanoscale*, 2017, 9, 17722.
- [7] J. Moulder, W. Stickle, W. Sobol, K. D. Bomben, Handbook of x-ray photoelectron spectroscopy A Reference Book of Standard Spectra for Identification, Physical Electronics, 1995.
- [8] V. Augustyn, J. Come, M.A. Lowe, J.W. Kim, P.L. Taberna, S.H. Tolbert, H.D. Abruna, P. Simon, B. Dunn, High-rate electrochemical energy storage through  $Li^+$  intercalation pseudocapacitance, *Nat. Mater.* 2013, 12, 518–522.
- [9] Shchukarev A, Korolkov D. XPS Study of Group IA Carbonates. *Open Chem.* 2004, 2, 347-362.
- [10] B. Brox, I. Olefjord. ESCA Studies of  $MoO_2$  and  $MoO_3$ . *Surface and Interface Analysis*, 1988, 13, 3.
- [11] Lu YC, Crumlin E. J, Veith G. M, et al. In Situ Ambient Oressure X-Ray Photoelectron Spectroscopy Studies of Lithium-Oxygen Redox Reactions. *Sci. Rep.* 2012, 2, 1-6.
- [12] Oswald S. Binding Energy Referencing for XPS in Alkali Metal-Based Battery Materials Research (I): Basic Model Investigations. *Appl. Surf. Sci.* 2015, 351, 492-503.
- [13] N. S. McIntyre, D. D. Johnston, L. L. Coatsworth, et al. X-ray photoelectron spectroscopic studies of thin film oxides of cobalt and molybdenum. *Surface and Interface Analysis*, 1990, 15, 265.
- [14] Sanjines R., Wiemer C., Almeida J., et al. Valence band photoemission study of the Ti Mo N system. *Thin Solid Films*, 1996, 290-291, 334-338.
